1 **scCAT-seq: single-cell identification and quantification of mRNA isoforms by**  
2 **cost-effective short-read sequencing of cap and tail**

3

4 Youjin Hu<sup>1,#,†</sup>, Jiawei Zhong<sup>1#</sup>, Yuhua Xiao<sup>1</sup>, Zheng Xing<sup>3</sup>, Katherine Sheu<sup>4</sup>, Shuxin  
5 Fan<sup>1</sup>, Qin An<sup>2</sup>, Yuanhui Qiu<sup>1</sup>, Yingfeng Zheng<sup>1</sup>, Xialin Liu<sup>1</sup>, Guoping Fan<sup>2</sup>, Yizhi Liu<sup>1</sup>,

6 †

7 <sup>1</sup> State Key Laboratory of Ophthalmology, Zhongshan Ophthalmic Center, Sun Yat-Sen University,  
8 Guangzhou, China

9 <sup>2</sup> Department of Human Genetics, David Geffen School of Medicine, UCLA, Los Angeles, CA,  
10 USA

11 <sup>3</sup> Earth, Planetary and Space Sciences, UCLA, Los Angeles, CA, USA

12 <sup>4</sup> Medical Scientist Training Program, David Geffen School of Medicine, UCLA, Los Angeles, CA,  
13 USA

14 # These authors contributed equally to this work.

15 † Correspondence to Yizhi Liu ([yzliu62@yahoo.com](mailto:yzliu62@yahoo.com)) or Youjin Hu ([huyoujin@gzzoc.com](mailto:huyoujin@gzzoc.com)).

16

17 **Abstract**

18 The differences in transcription start sites (TSS) and transcription end sites (TES) among gene isoforms  
19 can affect the stability, localization, and translation efficiency of mRNA. Isoforms also allow a single  
20 gene different functions across various tissues and cells. However, methods for efficient genome-wide  
21 identification and quantification of RNA isoforms in single cells are still lacking. Here, we introduce  
22 single cell Cap And Tail sequencing (scCAT-seq). In conjunction with a novel machine learning  
23 algorithm developed for TSS/TES characterization, scCAT-seq can demarcate transcript boundaries of  
24 RNA transcripts, providing an unprecedented way to identify and quantify single-cell full-length RNA  
25 isoforms based on short-read sequencing. Compared with existing long-read sequencing methods,  
26 scCAT-seq has higher efficiency with lower cost. Using scCAT-seq, we identified hundreds of  
27 previously uncharacterized full-length transcripts and thousands of alternative transcripts for known  
28 genes, quantitatively revealed cell-type specific isoforms with alternative TSSs/TEs in dorsal root  
29 ganglion (DRG) neurons, mature oocytes and ageing oocytes, and generated the first atlas of the  
30 non-human primate cornea. The approach described here can be widely adapted to other short-read or

31 long-read methods to improve accuracy and efficiency in assessing RNA isoform dynamics among  
32 single cells.

33

## 34 **Background**

35 The extent of cellular heterogeneity across different tissues and cell types has become  
36 increasingly apparent due to the development of genomics technology, especially  
37 single-cell omics sequencing (1-3). With the launch of initiatives such as the human  
38 single-cell atlas (4, 5), increased attention has been given to the regulatory  
39 mechanisms of cell-specific gene transcription, including both transcript abundance  
40 and alternative isoform usage, which can result in distinct protein sequences and  
41 structures (6, 7). RNA isoform variability includes intron inclusion, exon skipping,  
42 and alternative choice of transcription start sites (TSSs) (8) and transcription end sites  
43 (TESs) (9, 10). Alternative TSSs and TESs account for the majority of tissue-specific  
44 exon usage, are considered the principal drivers of transcript isoform diversity across  
45 tissues, and underlie the majority of isoform-mediated, cell-type specific proteomes  
46 (11). In addition, alternative TSS choices in the 5'-UTR, as well as alternative  
47 polyadenylation (APA) in the 3'-UTR regions play key roles in mRNA stability,  
48 translation, localization (9, 10, 12-14).

49 Previous studies have demonstrated the widespread heterogeneity of transcript  
50 isoforms with alternative 5'-TSS or 3'-APA across different cell types, resulting in the  
51 discovery of new transcripts with tissue- or cell-type specificity, and allowing updates  
52 to transcript annotations of reference genomes (13, 15). Despite considerable success  
53 in measurements made on bulk populations, current approaches for identifying RNA  
54 isoforms and the dynamics of TSS/TEs choices in single cells are limited.  
55 Fundamentally, there is currently no method for accurate, efficient, and quantitative  
56 analysis of RNA isoforms of single cells genome-wide. Most single-cell transcriptome  
57 approaches are based on single-ended quantification of RNA molecules (5' or 3')  
58 which give partial information on one end but not the whole transcript (3, 16, 17),  
59 resulting in loss of important information about the other end, especially for  
60 transcripts regulated by UTR regions on both ends (13). Methods based on single-cell

61 full-length cDNA amplification such as Smart-seq2 can detect the full-length cDNA,  
62 but its coverage at both ends is low, and it is not possible to accurately distinguish the  
63 start and end positions of different transcript isoforms of the same gene (18, 19).  
64 Recently, approaches based on long-read RNA sequencing technologies identified  
65 RNA isoforms of thousands of cells, but challenges still remain. For example, the  
66 sequencing depth needed to quantitatively assess the RNA isoform transcriptome  
67 makes long-read sequencing too expensive, and the conventional approach has been  
68 to first catalog isoforms using the long reads and then map short reads to the resulting  
69 transcriptome references for quantification. In addition, the requirement of several  
70 micrograms of cDNA input requires extensive PCR amplification from picograms of  
71 mRNA of a single cell, which unavoidably results in higher PCR bias towards specific  
72 isoforms.(13, 15, 20).

73 In order to address these problems, we developed a simple and efficient approach  
74 based on well-established short-read sequencing platforms to explicitly exploit  
75 transcription initiation and termination sites for the quantification of RNA isoforms in  
76 single cells. When deployed in conjunction with optimized machine learning models,  
77 scCAT-seq is more accurate and cost-effective, and has higher efficiency than existing  
78 methods, making it suitable for quantitative and qualitative analysis of isoform  
79 transcriptomes of single cells, and for analysis of RNA isoform dynamics in different  
80 biological contexts.

81

## 82 **Results**

83 To develop scCAT-seq, we adopted a strategy to capture the boundaries of transcripts  
84 at both 5' and 3' ends (21). Full-length cDNAs were first tagged with specific  
85 sequences adjacent to both TSSs and TESs and further amplified, based on a modified  
86 Smart-seq2 protocol (19). Segments of transcript ends with sequence tags were then  
87 tagmented out by Tn5 transposases and captured by targeted PCR amplification.  
88 Illumina sequencing adaptors were further added for standard Illumina sequencing. As  
89 expected, the reads with tags are distributed at the terminal sides of transcripts  
90 (**Supplementary Fig. 1a, b**). The analysis pipeline precisely determined TSSs by the

91 mapped position of reads with a head tag, along with the “GGG” signal added during  
92 reverse transcription. TESs were determined from paired reads (R1 containing a tail  
93 tag and R2 covering polyA sites) by mapping R2 sequences near polyA sites to the  
94 genome (**Fig. 1a**). Peaks were called using the CAGEr package (22). Internal TES  
95 peaks derived from the internal priming during reverse transcription of mRNA were  
96 excluded.

97 To improve the accuracy in identification of real TSSs/TESs, we decided to employ  
98 machine learning models. Based on the read distribution of scCAT-seq and  
99 Smart-seq2 of the same single cell samples, we collected potential features that could  
100 affect the identification of a peak as a TSS or TES peak (**Table 1**), and implemented  
101 three widely used machine learning models: logistic regression classifier (LR),  
102 random forest (RF), and support vector machine (SVM). The random forest model  
103 indicated that “Slope\_smart2\_curve” and “Percentage” were the most important  
104 features, while the logistic regression classifier and SVM put the highest weights on  
105 “TPM\_of\_Dominant\_Site” and “Trend\_of\_smart2\_read\_counts” (**Supplementary**  
106 **Fig. 1d, e**). To derive the best predictions, we chose an ensemble learning strategy of  
107 majority voting, integrating predictions from all models to systematically determine  
108 the real TSSs/TESs (**Fig. 1b**). Our strategy resulted in perfect performance on an  
109 independent test dataset of ERCC spike-in in single cells, with the true positive rate  
110 improved by 3.7- (27% versus 100%) and 2.2-fold (43% versus 95%) for TSS and  
111 TES, respectively (**Fig. 1c, d**), with sequencing depth of 4 million reads per sample  
112 (**Supplementary Table 1**). Similarly, ERCC data from other methods, such as C1  
113 CAGE (17), C1 STRT (23), and a method developed by Arguel et al. (24), also  
114 showed high false positive rates for peaks identified as TSSs, (**Supplementary Fig.**  
115 **1c**), but the accuracy was also improved to above 95% after using our machine  
116 learning model (**Supplementary Fig. 1f**), indicating that our model can be applied to  
117 other data sets that contain high false positive rates.

118

119 Table 1. Features used in the machine learning models

|                | Features               | Description of the features                                                                  |
|----------------|------------------------|----------------------------------------------------------------------------------------------|
| x <sub>1</sub> | TPM_of_peak            | The total TPM value of the peak called by CAGEr.                                             |
| x <sub>2</sub> | TPM_of_Dominant_Site   | The highest TPM value of all sites within a peak.                                            |
| x <sub>3</sub> | Gene_length            | The length of the transcript annotated.                                                      |
| x <sub>4</sub> | Peak_width             | The width of the peak called by CAGEr.                                                       |
| x <sub>5</sub> | Dominant_TPM_to_Smart2 | The ratio of Dominant_TPM to the RPM value of the corresponding gene revealed by Smart-seq2. |
| x <sub>6</sub> | Slope_smart2_curve     | The slope of Smart-seq2 coverage curve around the peaks                                      |
| x <sub>7</sub> | Trend_of_smart2_reads  | Calculated by dividing the number of reads increased/decreased within 50bp distance by 50    |
| x <sub>8</sub> | Percentage             | The percentage of read counts of a peak to the total counts of a transcript                  |

120 Using the sequencing data from mouse dorsal root ganglion (DRG) neurons for  
121 further benchmarking, we sequenced 18 DRG neurons with a mean of 2.4 million  
122 reads per cell (**Supplementary Table 2**). As genomic sequence features can specify  
123 the locations of TSSs and TESs, in addition to the eight features of read distribution,  
124 we added an additional 650 and 150 features of motifs related to TESs and TSSs. To  
125 train the TSS machine learning model, we used the data of neuron tissues from the  
126 FANTOM5 database (25), and to train the TES model, we used the mouse polyA sites  
127 peak from PolyA\_DB (26). Using these databases, with 70% of the data for training  
128 and 30% for testing, we found the prediction accuracy for TSS and TES to be 94.3%  
129 and 94.2% respectively (**Supplementary Fig. 1g**). In total, after pooling all 18 cells  
130 together and applying the machine learning model, we identified 11991 and 15481  
131 peaks as TSSs and TESs, which were significantly enriched at annotated TSS and  
132 TES regions, respectively (**Fig. 1e**). Over 93% of identified TSSs were located within  
133 1 kb of annotated TSSs, and over 86% of identified TESs were within 1kb of  
134 annotated TESs (**Supplementary Fig. 1h, i**). In summary, our results indicate that

135 scCAT-seq together with a machine learning model can identify TSSs and TESs of  
136 transcripts with high accuracy, allowing demarcation of transcription boundaries of  
137 full length isoforms.

138 Furthermore, we compared detected read counts with the known abundances of ERCC  
139 mRNA molecules to assess quantification performance. The measured abundances  
140 were highly concordant with the ground truth, with a Pearson's correlation coefficient  
141 of 0.98 for both TSS and TES (**Fig. 1f, Supplementary Fig. 2a**). For the annotated  
142 genes of the mouse genome, an internal comparison between random pools of 3 single  
143 cells, each from the oocyte population, gave a correlation coefficient of 0.96 and 0.94  
144 for the quantification of TSS and TES, respectively (**Fig. 1g, Supplementary Fig. 2b**).  
145 Thus, the quantification of TSS and TES is reliable and provides an accurate and  
146 reproducible measure of relative expression of transcript isoforms.

147 The sensitivity and efficiency were first estimated with ERCC spike-ins. The lowest  
148 detectable concentration was 4.4 molecules per million for both TSS and TES. In  
149 other words, at a detection threshold of  $TPM > 1$ , at least 4.4 molecules are required to  
150 get one detected read at sequencing depth of one million. Therefore, the sensitivity of  
151 this method is estimated at roughly 22.7% ( $1/4.4$ ) (**Fig. 1f**). This sensitivity is  
152 approximately the same as the 22%-26% sensitivity previously reported for detection  
153 of TSSs (24, 27, 28), but much higher than the 5.4% for TESs (29). In addition, the  
154 number of TSSs detected genome-wide by scCAT-seq is highly dependent on the  
155 number of reads mapped to the genome. Compared to existing methods which can  
156 detect only a single end of transcripts (either the 5'-TSS or the 3'-TES), scCAT-seq  
157 also has significantly better or comparable performance. When 1.28 million reads  
158 were mapped to the mouse genome, around 8000 transcripts were detected by  
159 scCAT-seq, comparable to the number for C1 CAGE (17) and the approach developed  
160 by Arguel et al. (24), but much higher than STRT-seq (21) and Smart-seq2 (19), which  
161 are the current single cell TSS profiling methods (**Supplementary Fig. 3a**). Similarly,  
162 for TES detection with 1.28 million uniquely mapped reads, scCAT-seq can determine  
163 TESs of more than 12000 transcripts, which is comparable to BAT-seq (29), and much  
164 higher than Smart-seq2 (**Supplementary Fig. 3b**). Further, we compared the

165 performance of scCAT-seq to that of scISOr-seq (15, 20) which is the only method  
166 available for profiling the full-length transcript of single cells. We sequenced 6 single  
167 oocytes with the Pacbio sequel platform, with 54,000 circular consensus sequencing  
168 (CCS) reads per single cell (**Supplementary Table 3**), which is much higher than that  
169 of 270 reads per cell reported by Gupta et al. (15), and similar to that reported by  
170 Byrne et al. on the Nanopore platform (20). By normalizing the sequencing depth to  
171 the cost for both scCAT-seq and scISOr-seq, we found scCAT-seq had a much higher  
172 efficiency in capturing both ends of full length isoforms than scISOr-seq, 3122 versus  
173 919 genes for scCAT-seq versus scISOr-seq at the equal cost for 4 million PE150  
174 short-reads from Illumina (**Fig. 1h, Supplementary Fig. 3c**). Around 15% of the  
175 genes could be detected by both methods, with a higher overlapping ratio in highly  
176 expressed genes (**Supplementary Fig. 3d, e**). In addition, for the number of  
177 overlapping genes between single cells, scCAT-seq had a 2-fold higher overlapping  
178 ratio than scISOr-seq (60% versus 30%), highlighting the high consistency of  
179 scCAT-seq (**Fig. 1i, Supplementary Fig. 3f, g**). Comparison of the expression of the  
180 transcripts detected by scISOr-seq and scCAT-seq showed that scISOr-seq mainly  
181 detected the part of transcripts with the highest abundance (**Fig. 1j**), which only  
182 account for 1/4 of those detected by scCAT-seq. Furthermore, for the same coverage,  
183 our approach drastically reduces library preparation and sequencing cost. For instance,  
184 scCAT-seq only requires 1/73 of the cost required by scISOr-seq for 1000 transcripts  
185 covered (**Supplementary Fig. 2c**). These results indicate that scCAT-seq is a more  
186 cost-effective and reliable approach for quantitatively detecting both start sites and  
187 end sites of full-length transcripts at single cell level.

188

### 189 **Identification of novel transcripts with scCAT-seq**

190 Leveraging the capacity to demarcate the boundaries a transcript, we set out to  
191 identify novel isoforms, both alternative TSSs/TESSs of annotated genes and novel  
192 transcripts of unannotated genes (**Fig. 2a**). Data from mouse oocytes and DRG  
193 neurons was used for benchmarking. For annotated genes, we identified both  
194 alternative TSSs and TESSs events, as evidenced by 3102 novel TSSs and 5746 novel

195 TESSs in oocytes (**Fig. 2b**), and 2031 novel TSSs and 4693 novel TESSs in DRG  
196 neurons (**Fig. 2c**). In addition, 71 and 107 novel, unannotated transcripts were  
197 identified in DRG and oocytes respectively. Of note, many RNA isoforms identified  
198 by scCAT-seq, and validated by Smart2-seq and Sanger sequencing, were drop-out by  
199 scISOr-seq (**Fig. 2d, f, h**), indicating that scCAT-seq can identify novel transcripts  
200 with higher efficiency than scISOr-seq.

201 Further, to characterize the full-length information of novel RNA isoforms, such as  
202 alternatively spliced exons, full-length cDNAs were cloned with primers binding to  
203 the terminal ends identified by scCAT-seq (**Fig. 2a**). Full-length transcripts were  
204 sequenced by Sanger sequencing or scISOr-seq, and validated by Smart2-seq (**Fig.**  
205 **2d-i**). For example, Figure 2f shows an example of novel gene with several isoforms,  
206 which were identified by Sanger sequencing of full-length cDNAs. Three isoforms  
207 differing in cDNA length have differential first exon choices (**Fig. 2f, g**), and  
208 alternative splicing events between isoform 2 and isoform 3 were revealed, which  
209 were also validated by Smart-seq2, including the exon not detected by scISOr-seq. In  
210 total, 96% (68/71) of novel transcripts detected by scCAT-seq were validated by  
211 Smart-seq2, while only 10% (7/71) of them were detected by scISOr-seq, indicating  
212 high drop-out rate of full-length transcripts in scISOr-seq. Our data suggest that when  
213 combined with targeted full-length sequencing, scCAT-seq can achieve higher  
214 coverage to reveal different isoforms of individual genes. In summary, scCAT-seq can  
215 accurately identify not only novel TSSs and TESSs, but also completely unannotated  
216 full-length transcripts in single cells.

217

218 **scCAT-seq improves upon the performance of scISOr-seq for single cell RNA**  
219 **isoform quantification.**

220 Due to the higher efficiency and lower cost of scCAT-seq compared to scISOr-seq for  
221 identifying alternative isoforms, we hypothesized that scCAT-seq could also improve  
222 upon performance of scISOr-seq for accurately quantifying alternative isoforms  
223 (**Supplementary Fig. 4a**). It is currently too expensive to use scISOr-seq to obtain the  
224 sequencing depth required for accurate isoform quantification of multiple samples,



225 especially at single cell level. Byrne et al. also tried to quantify isoforms with the  
226 number of CCS reads, but the number of genes covered was very limited.  
227 Concordantly, our data showed that the CCS readout for the majority of genes covered  
228 was less than 3 even though the sequencing depth was 0.5M for one single cell  
229 (**Supplementary Fig. 4b**). Although CCS read numbers are positively correlated with  
230 the number of reads of scCAT-seq, much higher variation was observed for the former  
231 with 10- to 1000-fold fewer read counts (**Supplementary Fig. 4c, d**). Intriguingly,  
232 when using the scCAT-seq to quantify the isoforms identified by scISOr-seq, the  
233 squared coefficient of variation ( $CV^2$ ) was reduced at least 10-fold, making isoform  
234 quantification much more accurate (**Supplementary Fig. 4d**). For example, two  
235 alternative isoforms of *Ermp1* were quantified with a CCS number below 5 in both  
236 DRG and oocytes, without sufficient power to differentiate the quantification of the  
237 two isoforms (**Supplementary Fig. 4e, f**). However, when quantified with scCAT-seq,  
238 with much lower variance, the longer isoform was found to be significantly higher  
239 expressed in oocytes than in DRGs. In summary, scCAT-seq can be used to quantify  
240 isoforms identified by scISOr-seq in single cells to improve accuracy with lower cost.

241

#### 242 **Characterization and quantification of cell-type specific transcripts with** 243 **scCAT-seq**

244 To further assess differential gene expression between different cell types based on  
245 quantified abundances of TSS and TES tag counts, we performed scCAT-seq on three  
246 different cell types – mouse DRG, oocytes at Day 3, and oocytes at Day 4. Both TSS  
247 and TES transcriptome data clearly discriminated different cell types from each other  
248 (**Fig. 3a, Supplementary Fig. 5a**). In addition, because our method can identify both  
249 ends of transcripts, we set out to identify cell type specific transcript isoforms.  
250 Comparing DRG and oocyte cell-type specific isoforms, we identified 166 transcript  
251 isoforms encompassing 83 genes that only differed in TSS choices, and 222 isoforms  
252 encompassing 111 genes that only differed in TES choices (**Fig. 3b, Supplementary**  
253 **Fig. 5b, c**). For example, *Tsc22d1* and *Grpel* had no difference in total gene  
254 expression between DRG and oocytes, but the two isoforms of each gene were

255 expressed in a cell-type specific manner (**Fig. 3c, Supplementary Fig. 5d-f**).

256 We also used scCAT-seq to assess RNA dynamics during ageing of post-ovulatory

257 oocytes, and compared oocytes at day 3 post-ovulation (control) with oocytes at day 4

258 post-ovulation (post-ovulatory ageing oocytes). After assessing the 975 detectable

259 TSSs and TESs across the control and ageing oocytes, we found that TESs are more

260 prone to change positions, and the alternative choice of TESs is strongly associated

261 with TSSs invariability (**two-sided Fisher's exact test, P value =  $3.0 \times 10^{-53}$** ),

262 supporting the notion of interdependency between transcription initiation and

263 polyadenylation (**Fig. 3d**). Further, a change in the choice of major isoform from day

264 3 to day 4 oocytes is observed in 343 genes with alternative TSSs and 1612 genes

265 with alternative TESs, with a trend that shorter 5' UTRs (**Fig. 3e**) or longer 3' UTR

266 are preferred (**Fig. 3f**). Thus, using scCAT-seq we can observe that the dynamics of

267 major isoform choice during oocyte ageing is accomplished according to a general

268 rule, which is through degradation of the major isoform on day 3, and activation of

269 the minor isoform to switch to the alternative major isoform on day 4, as illustrated by

270 *Ska3* (**Supplementary Fig. 6a**). In addition, the observations made by RT-qPCR

271 validated our scCAT-seq data analysis (**Supplementary Fig. 6b**).

272

### 273 **Single cell atlas of non-human primate corneal epithelial based on RNA**

### 274 **expression and APA analysis.**

275 We next employed scCAT-seq to profile a much larger number of single cells. Taking

276 the non-human primate cornea as an example, we collected single cells and generated

277 multiplexed cDNA using the 10x genomics platform. scCAT-seq libraries were

278 subsequently generated and sequenced, and the 7848 single cells successfully

279 captured were clustered into 5 major groups. Hundreds of marker genes for each cell

280 type were identified (**Supplementary Fig. 7a**), with GO items relating to epithelial

281 development enriched in the genes up-regulated and those relating to cell adhesion

282 down-regulated (**Supplementary Fig. 7b, c**). Based on the RNA expression of the

283 known marker genes, the following subtypes were identified: corneal epithelial cells

284 (CEC) highly expressing KRT3 and KRT12, transient amplifying cells (TAC) highly

285 expressing KRT12 but not KRT3, and limbal epithelial cells (LEC) highly expressing  
286 KRT19 (**Fig. 3g**). Pseudotime analysis on scCAT-seq data revealed the trajectory from  
287 TAC to LEC and CEC (**Fig. 3h**). We next identified the cell-type specific isoforms of  
288 the three major subtypes and assessed their dynamics. From TAC to LEC, we found  
289 285 genes and 244 genes switched to proximal and distal APA sites, respectively (**Fig.**  
290 **3i**). From TAC to CEC, we found 457 genes and 414 genes switched to proximal and  
291 distal APA sites, respectively (**Supplementary Fig. 8a**). For example, the longer  
292 isoform of UBE2B preferentially uses the distal TES in CEC, while the shorter  
293 isoform preferentially uses the proximal TES in TAC (**Supplementary Fig. 8b**). We  
294 also found that expression of genes with proximal APA sites was significantly higher  
295 in TAC than CEC/LEC, while there was no significant difference in expression  
296 between CEC and TAC for genes with distal APA sites in epithelial cells, suggesting a  
297 potential role of proximal APA choices in gene regulation during differentiation of  
298 epithelial cells from TACs (**Supplementary Fig. 8c-f**).

299

## 300 **Discussion**

301 The approach we introduce here is highly accurate for transcript demarcation and  
302 isoform quantification in single cells. Through a machine learning algorithm that  
303 employs a majority voting strategy, the noisy false positive peaks were filtered out,  
304 enabling scCAT-seq to identify authentic terminal signatures with a true positive rate  
305 of 95%. Previously, machine learning has been successfully used to predict  
306 differential alternative splicing (30, 31), but none of them can be used to identify  
307 authentic demarcation of RNA isoforms to elucidate the transcriptomic complexity of  
308 single cells. The machine learning model developed here can also improve the  
309 accuracy of other methods to 95% , as evidenced by the ERCC data from C1 CAGE  
310 (17), C1 STRT (23), and Arguel et al., indicating that our model can be applied to  
311 other data sets that contain previously unrecognized high false positive signals. In  
312 addition to identification, the accuracy of our approach for quantification of the  
313 alternative isoforms is also very high, as the measured abundances are highly  
314 concordant with the ground truth, with a pearson's correlation coefficient of 0.98. The

315 high accuracy of both identification and quantification of isoforms provides an  
316 unprecedented opportunity for detection of previously unannotated genes and  
317 unidentified alternative TSSs and TESs, as well as for quantitation of cell-type  
318 specific RNA isoforms.

319 Another clear advantage of scCAT-seq is its efficiency. Based on short-read  
320 sequencing, scCAT-seq can identify TSSs and TESs simultaneously from sequencing  
321 data derived from a single library, enabling investigation of transcription initiation and  
322 polyadenylation in a large number of single cells. Compared with methods which  
323 capture only single ends of RNA transcripts, either the TSS or TES, scCAT-seq is  
324 demonstrably better for elucidating transcriptome complexity.

325 Compared with the recently developed long-read sequencing based method  
326 scISOR-seq, which can profile full-length transcripts for a group of single cells (15,  
327 20), our approach requires 1/73 of the cost to detect the same number of transcripts,  
328 with higher efficiency. In addition, scISOR-seq requires at least 1 $\mu$ g of cDNA input,  
329 necessitating extensive amplification of cDNA with unavoidable PCR bias due the  
330 requirement for extra PCR cycles. This results in a decrease in the number of covered  
331 transcripts (a few hundred per single cell) and a lower transcript overlap ratio among  
332 single cells. In contrast, scCAT-seq only requires 0.1 ng of cDNA to achieve sufficient  
333 coverage of thousands of genes. Most importantly, it is still challenging to use  
334 scISOR-seq to quantify the isoforms differentially expressed between single cells, as  
335 accurate quantification requires deep sequencing that is currently too expensive for  
336 many labs. In contrast, our method can accurately quantify the transcripts ( $r=0.98$ ) at  
337 an affordable cost for most labs. Due to the high accuracy and efficiency of  
338 scCAT-seq in identifying transcript ends, scCAT-seq also offers an efficient pipeline  
339 for full-length characterization of novel isoforms after targeted construction of  
340 full-length cDNA libraries, simply by PCR from the terminal sites identified by  
341 scCAT-seq in single cells.

342 In summary, the performance of scCAT-seq is a significant improvement upon that of  
343 scISOR-seq in terms of cost, efficiency, and accuracy of both identification and  
344 quantification of RNA isoforms.

345 Like all technologies, scCAT-seq has its limitations. First, the initial accuracy of TSS  
346 and TES identification is dependent on the effective cloning of full length cDNA.  
347 Although we adapted a widely used method Smart-seq2 to obtain cDNA, other  
348 protocols with better performance may be substituted in the future. Second, whereas  
349 the information of full-length isoforms of novel genes can be revealed by PCR using  
350 primers targeted to transcript ends identified by scCAT-seq, in this study we  
351 multiplexed only small number of example genes. However, profiling full-length  
352 transcripts with higher multiplexing can be done by complementing scISOr-seq  
353 downstream of scCAT-seq, in order to efficiently profile the targeted amplified  
354 full-length cDNA libraries. Including the scCAT-seq approach to initially identify  
355 isoforms of interest will help increase the efficiency of scISOr-seq with lower cost.  
356 In conclusion, we believe that this robust and cost-effective approach is an ideal  
357 technology for comprehensive and systematic assessment of RNA isoform dynamics  
358 across heterogeneous single cells and biological conditions. Not only can it help  
359 define cell types with specific isoform expression patterns, but it can also establish a  
360 multi-faceted mammalian cell atlas in conjunction with other methodologies to  
361 identify tissue specific epigenetic elements, genotypes, and cis-elements. It can be  
362 widely implemented and may play important roles in projects such as the Human  
363 Single Cell Atlas.

364

## 365 **Methods**

366 **Single cell isolation.** The experiment was performed on 4-6 week old C57BL/6 mice  
367 of both genders. Mice were maintained under standard conditions (12 h light and dark  
368 cycles, with sufficient food and water). To obtain single DRG neurons, euthanasia was  
369 performed by CO<sub>2</sub> and cervical dislocation, L4-L5 DRG from mice of both sides were  
370 dissected and dissociated into single cells. Single DRG neurons were manually picked  
371 by using a micro-capillary pipette. Single cells were incubated into a 0.2-ml thin-wall  
372 PCR tube containing 4 µl Smart-seq2 lysis buffer according to the published  
373 protocol(19, 32). To obtain postovulatory-aged oocytes, female mice were  
374 administered intraperitoneal injections of 10 IU pregnant mare serum gonadotropin

375 and 10 IU human chorionic gonadotropin 48 hours later. Cumulus-oocyte-complexes  
376 (COCs) were collected 24 h after human chorionic gonadotropin injections from the  
377 oviductal ampullae. All cumulus cells were removed from the oocytes enzymatically  
378 by trypsin treatment (Sigma-Aldrich) for 2 min and oocytes were subsequently  
379 washed in DMEM medium containing 10% fetal bovine serum (FBS)  
380 (Sigma-Aldrich). Oocytes were picked into a 0.2-ml thin-wall PCR tube contains 4  $\mu$ l  
381 Smart-seq2 lysis buffer as described before.

382

383 **scCAT-seq library construction.** The full-length cDNA was generated through  
384 reverse transcription with transcriptase III and the RT primer  
385 (5'-AAGCAGTGGTATCAACGCAGAGTN4 [16bp of cell barcode] T30VN-3'),  
386 followed by PCR amplification according to Smart-seq2 protocol(19) with minor  
387 modification that Superscript II was replaced by superscript III to improve the yield of  
388 cDNA. ERCC RNA spike-in Mix which contains 92 transcripts (Thermo Fisher) was  
389 added and processed in parallel with poly-A RNA. After purification, 0.1 ng cDNA  
390 was used for Nextera tagmentation and fragments of both ends of the cDNA were  
391 selectively amplified by using the primers targeting TSO and Tn5 adaptors as shown  
392 in Fig. 1a. Library are purified using  $1.8 \times$  Agencourt AMPure XP beads  
393 (BECKMAN COULTER), and then loaded on an E-Gel 2% SizeSelect, and fragments  
394 of a length of 200-300bp bases were selected. Simultaneously, 0.1 ng of cDNA was  
395 used for standard Smart-seq2 libraries. Library was assessed by using Agilent  
396 Bioanalyzer 2100, and sequenced on Illumina Xten platform. The rest of the cDNA  
397 were used for PacBio ISO-seq analysis.

398

399 **Single cell ISO-seq.** Single cell ISO-seq was performed on PacBio Sequel platform.  
400 Full-length cDNA of eight single cells were mixed together to reach the total amount  
401 of 2ug for each flowcell. PacBio library construction is done by using SMRTbell  
402 Template Prep Kit (PacBio cat#100-991-900), and sequenced using SMRTcells  
403 (PacBio cat#101-008-000), with eight single sample per SMRTcell.

404

405 **Single cell isolation of crab-eating monkey cornea epithelium and library**  
406 **construction.** Whole eyes were dissected from a healthy crab-eating monkey. The  
407 lens, retina, iris, and trabecular network were removed and most of the conjunctiva  
408 was dissected and discarded. The corneal rims were subsequently treated with 1.5mL  
409 of 10mg/mL Dispase II in PBS at 37°C for 2 hours and 0.25% trypsin and 1 mM  
410 EDTA solution at 37°C for 15 minutes with gentle pipetting to yield single cells  
411 suspension. The disassociated corneal epithelial cells were captured on the 10x  
412 Genomics Chromium controller according to the Chromium Single Cell 3' Reagent  
413 Kits V2 User Guide (10x Genomics PN-120237). Library was prepared using 0.3ng  
414 cDNA from 10x Genomics following the scCAT-seq protocol as described above.

415

416 **Data processing of next generation sequencing data.** TSS and TES raw data were  
417 extracted and processed separately. For TSS data, reads with the sequencing tag  
418 5'-GTGGTATCAACGCAGAGTACATGGG-3' were selected, and TSO sequences  
419 5'-GTGGTATCAACGCAGAGTACAT-3' were trimmed away with the "GGG" tag  
420 retained. Then, these reads were aligned to mouse genome (mm10) with STAR  
421 (version 2.6.1a) with parameters (--outFilterMultimapNmax 1  
422 --outFilterScoreMinOverLread 0.6 --outFilterMatchNminOverLread 0.6). Uniquely  
423 mapped reads were kept but discarded if the 5' GGG was mapped. Reads that aligned  
424 to ribosomal RNA region were also discarded.

425 For the TES data, we first processed to remove 3' adaptor sequences with cutadapt  
426 (version 1.18), and then extract pairing reads with R1 has 3' Tag and R2 contains at  
427 least 10 polyA sequences at the 3' side. Poly A sequences in the end of R2 were  
428 further trimmed with 5 A bases left at the 3' side. By using STAR with parameters  
429 described above, reads were aligned to mouse genome (mm10). The reads with the  
430 terminal 5 A bases not mapped to the genome were retained for downstream analysis  
431 for polyadenylation sites. Reads mapped to multiple sites, with low quality alignment,  
432 and aligned to mitochondrial or ribosomal RNA region were discarded.

433 For Smart-seq2 data, raw reads past quality control were aligned by STAR using  
434 parameter as described above. Only reads that uniquely mapped to mm10 were

435 retained and read count on each gene in each sample was computed using  
436 featureCounts (33). Differentially expressed gene analysis was performed using  
437 SCDE (version 2.10.1) (34).

438 For comparison, we downloaded BAT-seq data (accession number: GSE60768), C1  
439 STRT (accession number: GSE60361) data and data generated by Arguel et al.  
440 (accession number: GSE79136) from the Gene Expression Omnibus database. C1  
441 CAGE data were downloaded from DDBJ (Project ID: PRJDB5282). For the BAT-seq  
442 data, we picked 192 mouse ES cells. For the C1 STRT data, 80 mouse cerebellum  
443 cells from the single-cell dataset were randomly picked. Same strategies were used  
444 with small modification to process C1 STRT data and BAT-seq data. For all data, we  
445 converted bam files to bed files with BEDtools (version 2.27.1). For 5' end data, we  
446 extract the 5' end from bed files for further analysis. Likewise, we extract the 3' end  
447 from bed files for 3' end data.

448

#### 449 **Data processing of scISO-Seq data**

450 Circular consensus reads (CCS) were obtained from the raw data of subreads Bam  
451 files by using PacBio Sequel SMRT-Link 7.0 Soft, with the default setting of  
452 parameters: minLength 10, maxLength 21000, minReadScore 0.75, minPasses 3.  
453 Then, reads were considered FLNC if they contained 5' and 3' primers in addition to a  
454 polyA tail. Primer and polyA tails were removed by cutadapt. Further, FLNC reads  
455 were aligned to reference genome mm10 using Minimap2(35) (version 2.17) with  
456 parameters (-t 30 -ax splice -uf --secondary=no -C5 -O6,24 -B4). CCS count on each  
457 gene in each sample was computed using featureCounts. The output Sam files were  
458 fed into Cupcake ToFU to collapse the mapped FLNC reads into unique transcripts.  
459 Scripts are available at: [https://github.com/Magdoll/cDNA\\_Cupcake](https://github.com/Magdoll/cDNA_Cupcake). Eventually,  
460 isoforms were identified and filtered using SQANTI2 against mm10 transcriptome  
461 annotation.

462

463 **Peak calling.** To identify TSSs and TESs, we used CAGER (version 1.24.0) package  
464 in R. Peaks were called using distclu (threshold = 5, nrPassThreshold = 1,



465 thresholdIsTpm = TRUE, removeSingletons = FALSE, keepSingletonsAbove = 10,  
466 maxDist = 20). The position of dominant TSS/TES in each peak was set to represent  
467 the position of peak. TSS and TES annotation reference was based on gencode  
468 release\_M18, and peaks mapped between 2kb upstream the annotated TSSs and 2k  
469 downstream the annotated TESs were considered to belonging to the said gene. We  
470 then extracted 5'-end and 3'-end of all annotated transcripts and converted to bed files  
471 with a custom R script, and distance between the called peaks and the nearest  
472 annotated TSS/TES was calculated by a custom script. We adopted the following  
473 priority in calculating the distribution of TSS peaks mapped to genome features:  
474  $TSS \pm 1000 > 5' \text{ UTR} > \text{first exon} > \text{first intron} > \text{other exon} > \text{other intron} > 3' \text{ UTR} >$   
475  $\text{intergenic}$ . Similarly, The priority in calculating distribution of TES peaks mapped to  
476 genome features is  $TES \pm 1000 > 3' \text{ UTR} > \text{last exon} > \text{last intron} > \text{other exon} > \text{other}$   
477  $\text{intron} > 5' \text{ UTR} > \text{intergenic}$ .

478

479

480 **Machine learning analysis.** To predict a peak is real or false TSS/TES, we employed  
481 three widely used models, including logistic regression classifier, random forest and  
482 support vector machine.

483

484 Firstly, we use eight features of read distribution to train the three machine learning  
485 models and they are summarized in the table 1. To perform the analysis, we used two  
486 independent data sets derived from ERCC spike-ins which can serve as a standard for  
487 true TESs/TSSs determination, one is for training data, and the other is for test data.  
488 The features were normalized, "TPM\_of\_peak", "TPM\_of\_Dominant\_Site" are firstly  
489 being taken a log and secondly normalized to be in the range of [0,1]. Training data  
490 was generated by using scCAT-seq for ERCC spike-ins, and the test data was derived  
491 from the ERCC spike-ins mixed in the single cells. The True positive and False  
492 positive of TSSs and TESs predicted was calculated. Secondly, for the genomic data,  
493 in addition to the eight features of read distribution, we added an additional 650 and  
494 150 features of motifs related to TESs and TSSs, and used FANTOM5 database (25)

495 and PolyA\_DB (26) to train the model for TSS and TES prediction respectively.  
496 TSSs/TEs were predicted from the peaks of single cells based on scCAT-seq. We  
497 utilize the popular open source python machine learning library scikit-learn to train  
498 these models.

499 With a logistic regression model, the probability ( $\pi$ ) of a peak with the given values of  
500 the features ( $x_1, x_2, x_3, x_4, x_5, x_6, x_7, x_8$ ) was determined as:

$$501 \quad \pi = p(y = 1|x; w) = \frac{1}{1+e^{-w^T x}} ;$$

$$w^T x = w_0 + w_1 x_1 + w_2 x_2 + w_3 x_3 + w_4 x_4 + w_5 x_5 + w_6 x_6 + w_7 x_7 + w_8 x_8$$

502 Where the ( $x_1, x_2, x_3, x_4, x_5, x_6, x_7, x_8$ ) are the observed value of the features  
503 shown in **Table 1**, and  $w_0, w_1, w_2, w_3, w_4, w_5, w_6, w_7, w_8$  are the coefficients  
504 of the corresponding features of the training model. The decision was made based on  
505 the following function:

$$y = \ln \frac{\pi}{1 - \pi}$$

506 We also applied L2 regularization and the coefficient is determined using cross  
507 validation on the training set.

508

509 Random forest model(36) consists of a large number of individual decision trees that  
510 operate as an ensemble. Every tree in the random forest makes its own class  
511 prediction and the class with the most votes becomes the random forest model's  
512 prediction. In random forest, each decision tree is independently trained using partial  
513 features and bootstrap sampled training data. To generate a tree, it has to go over each  
514 feature, and find the best one has the maximum gini index reduction(37) after splitting.  
515 The gini index for each node is defined as:

$$\text{Gini}(D) = 1 - \sum_{k=1}^N p_k^2$$

516 Where D is a node in the tree, N is the number of different classes, and  $p_k$  is the  
517 percentage of data in this node that is labeled class k. Conceptually, gini index reflect  
518 how different they are if we randomly choose two samples from the node. The smaller  
519 the gini index, the more pure the node is. After the split, if the child node still contains

520 more than one class, it will go through the search process again to split it. This  
521 process generally ends when all the leaf nodes contain only one class samples. An  
522 example of a decision tree learned is shown as below:

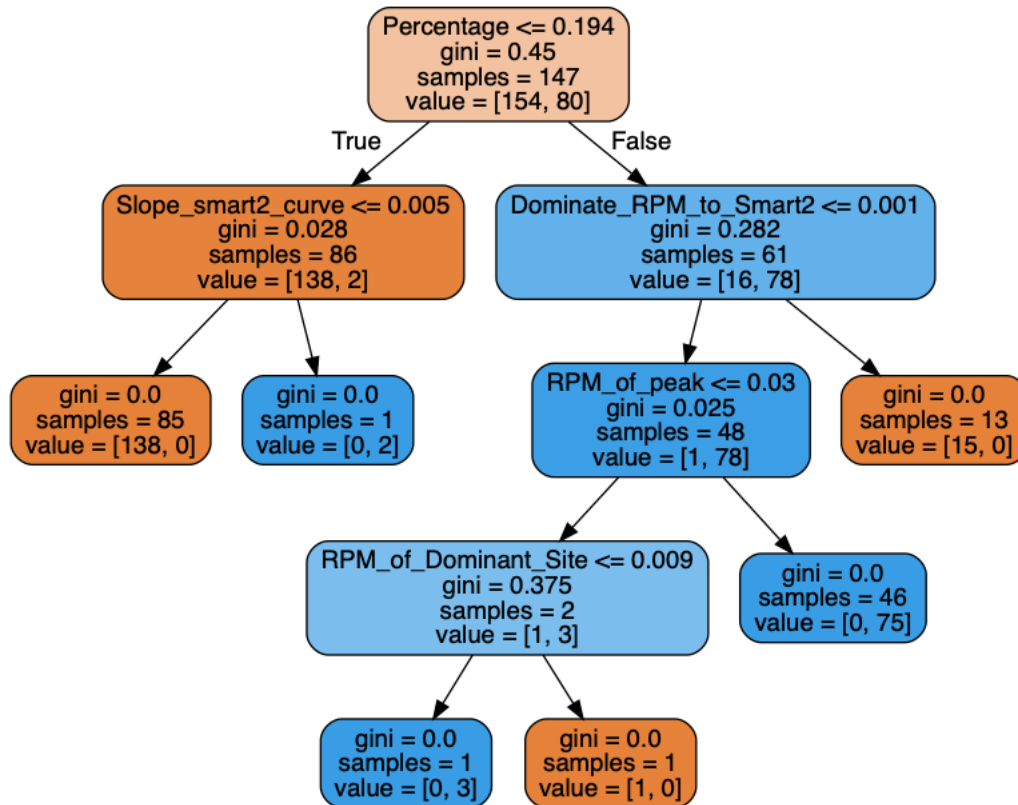

523

524

525 In every node of the tree in this plot, it first shows the selected feature and splitting  
526 criteria to maximize gini index reduction. Then it shows the gini index for this node.  
527 The “samples” represents number of distinct samples this node has. And the value has  
528 two numbers, corresponding to the number of negative and positive training data  
529 (some training data can have multiple copies since they are bootstrapped from the  
530 original dataset). After we have learned a number of decision trees, we’ll do a majority  
531 vote using all the trees’ predictions. In statistical theory, this step helps reduce model  
532 variance.

533 The SVM(38) is another widely used supervised machine learning models for two  
534 class classification (can be extended for multi-class classification and regression as  
535 well.) The SVM algorithm tries to find a hyper plane in a mapped high dimensional  
536 space (with kernel trick) that separates the two classes that achieves largest margin.

537 From any textbook, the SVM with soft margin and regularization is formularized as:

$$\begin{aligned} \min_{\{w,b,\xi_i\}} \quad & \frac{1}{2} \|w\|^2 + C \sum_{i=1}^m \xi_i \\ \text{s. t.} \quad & y_i(\theta^T x_i + b) \geq 1 - \xi_i, \\ & \xi_i \geq 0, i = 1, 2, \dots, m \end{aligned}$$

538 Where  $\xi_i$  is used to allow soft margin, and  $m$  is the number of training data you have.

539 The  $C$  controls the relative regularization and is determined using cross validation

540 method. And  $w$  is the vector of weights, and  $x$  is the feature vector.

541 Lastly, we try to further improve model performance by ensemble all three models.

542 Dietterich (39) indicated statistical, computational and representational benefits of

543 combining models. This theory is also validated here as the ensembled model

544 achieves better performance than any one of the three models alone, despite the fact

545 that the three models already achieve good performance on their own.

546

#### 547 **Quantification of cell-type specific isoforms**

548 Expression values for each peak (TSS/TES) were quantified as tags per million (TPM)

549 generated by CAGER. To identify cell-type specific isoforms, the major TSS/TES

550 positions of genes co-expressed between the two types of cells are compared by

551 intersect the bed files of each with BEDtools (40). Genes with either alternative TSS

552 or alternative TES between the two were selected. Then, the differential expression

553 analysis on the TPM value of the major isoform of each cell type between the two was

554 performed with DESeq2. **Further**, we performed qRT-PCR with Unique Aptamer<sup>TM</sup>

555 qPCR SYBR<sup>®</sup> Green Master Mix (Novogene) on the RocheLightCycler480 (Roche)

556 using the same samples used for next-generation sequencing to validate the alternative

557 TES in different cell types. All assays were run in triplicate for six individual samples.

558 The qRT-PCR conditions used were as follows: 5 min at 95°C, 45 cycles of 10 sec at

559 95°C and 30 sec at 60°C. The qRT-PCR primers sequences used were listed in

560 Supplementary Table 4. Gene body primers were used to quantify total gene

561 abundance. 3' UTR primers were used to quantify long 3' UTR isoform. Data were

562 analyzed using the  $2^{-\Delta\Delta Ct}$  method.

563

564 **Sequencing full-length cDNA of target genes.** Primers were designed according to  
565 the coordinates of TSS/TES identified by scCAT-seq. Full-length cDNA of all  
566 isoforms of a target gene was amplified by PCR from the cDNA pool of single cells  
567 generated with Smart2-seq. Briefly, 1 ng full length cDNA was used to perform  
568 35-cycle PCR with Premix Taq<sup>TM</sup> (TaKaRa). PCR products were purified with  
569 QIAquick Gel Extraction Kit (Qiagen) and Sanger-sequenced with corresponding  
570 primers. All assays were performed for three individual single cell samples. PCR  
571 primers used for novel genes are listed in Supplementary Table 5.

572

573 **Data processing of corneal single-cell data.** Each 10x droplet sequencing data was  
574 processed using the Cell Ranger (version 2.1.1) pipeline from 10x Genomics. In brief,  
575 reads was demultiplexed and aligned to the *Macaca fascicularis* genome. UMI counts  
576 was quantified to generate a gene-barcode matrix. Cells were filtered to remove those  
577 containing less than 500 genes. Genes that were detected in less than 3 cells were also  
578 removed. Further analyses of these cells were performed using the Seurat (version  
579 3.0.2) R packages, as described in the tutorials ("<https://satijalab.org/seurat/>")(41).  
580 Briefly, cells were normalized using LogNormalize and multiplied by a scale factor of  
581 10000. HVGs (high variable genes) were identified and used for further analysis.  
582 Shared cell states were identified using integration procedure in Seurat.

583 Dimensionality reduction was performed using principal component analysis (PCA).  
584 Statistically significant PCs were identified using the Jackstraw function. The score of  
585 cells in those significant PCs were used to build a k-nearest neighbor (KNN) graph.  
586 Louvain algorithm was used for identifying cell clusters in KNN graph (parameter  
587 resolution=0.06). Uniform manifold approximation and projection (UMAP)  
588 dimensionality reduction was used to project these populations in two dimensions.  
589 Pseudotime analyses of CEC was performed using Monocle2 (42) (version 2.12.0) R  
590 package. Differentially expressed genes among LEC, CEC and TAC were identified  
591 using differentialGeneTest function and used as input for temporal ordering of those  
592 cells along the differentiation trajectory.

593

594 **Code availability.** Custom computer code used in this study is freely available at  
595 <https://github.com/huyoujinlab/scCAT-seq>.

596

### 597 **Availability of data and material**

598 All the related data can be downloaded from GEO with the accession number  
599 **GSE134311**.

600

### 601 **Acknowledgement**

602 The work is supported by National Key R&D Program of China (2018YFA0108300,  
603 2017YFC1001300); National Natural Science Foundation of China (31700900;  
604 81530028; 81721003); Clinical Innovation Research Program of Guangzhou  
605 Regenerative Medicine and Health Guangdong Laboratory (2018GZR0201001);  
606 Local Innovative and Research Teams Project of Guangdong Pearl River Talents  
607 Program; the State Key Laboratory of Ophthalmology, Zhongshan Ophthalmic Center,  
608 Sun Yat-sen University.

609

### 610 **References**

611

- 612 1. Trapnell C (2015) Defining cell types and states with single-cell genomics. *Genome Res*  
613 25(10):1491-1498.
- 614 2. Wagner A, Regev A, & Yosef N (2016) Revealing the vectors of cellular identity with single-cell  
615 genomics. *Nat Biotechnol* 34(11):1145-1160.
- 616 3. Tang FC, *et al.* (2009) mRNA-Seq whole-transcriptome analysis of a single cell. *Nat Methods*  
617 6(5):377-U386.
- 618 4. Regev A, *et al.* (2017) The Human Cell Atlas. *Elife* 6.
- 619 5. Nosedà M & Harding SE (2018) Understanding dynamic tissue organization by studying the  
620 human body one cell at a time: the human cell atlas (HCA) project. *Cardiovasc Res*  
621 114(12):E93-E95.
- 622 6. Barash Y, *et al.* (2010) Deciphering the splicing code. *Nature* 465(7294):53-59.
- 623 7. Pan Q, Shai O, Lee LJ, Frey J, & Blencowe BJ (2008) Deep surveying of alternative splicing  
624 complexity in the human transcriptome by high-throughput sequencing. *Nat Genet*  
625 40(12):1413-1415.
- 626 8. Donczew R & Hahn S (2018) Mechanistic Differences in Transcription Initiation at TATA-Less  
627 and TATA-Containing Promoters. *Mol Cell Biol* 38(1).
- 628 9. Di Giammartino DC, Nishida K, & Manley JL (2011) Mechanisms and consequences of  
629 alternative polyadenylation. *Mol Cell* 43(6):853-866.
- 630 10. Moqtaderi Z, Geisberg JV, & Struhl K (2018) Extensive Structural Differences of Closely

- 631 Related 3' mRNA Isoforms: Links to Pab1 Binding and mRNA Stability. *Mol Cell* 72(5):849-861  
632 e846.
- 633 11. Reyes A & Huber W (2018) Alternative start and termination sites of transcription drive most  
634 transcript isoform differences across human tissues. *Nucleic Acids Res* 46(2):582-592.
- 635 12. Liu YL & Elliott DJ (2010) Coupling genetics and post-genomic approaches to decipher the  
636 cellular splicing code at a systems-wide level. *Biochem Soc T* 38:237-241.
- 637 13. Anvar SY, *et al.* (2018) Full-length mRNA sequencing uncovers a widespread coupling  
638 between transcription initiation and mRNA processing. *Genome Biol* 19.
- 639 14. Chen W, *et al.* (2017) Alternative Polyadenylation: Methods, Findings, and Impacts. *Genom*  
640 *Proteom Bioinf* 15(5):287-300.
- 641 15. Gupta I, *et al.* (2018) Single-cell isoform RNA sequencing characterizes isoforms in thousands  
642 of cerebellar cells. *Nat Biotechnol* 36(12):1197-+.
- 643 16. Hochgerner H, *et al.* (2017) STRT-seq-2i: dual-index 5' single cell and nucleus RNA-seq on an  
644 addressable microwell array. *Sci Rep-Uk* 7.
- 645 17. Kouno T, *et al.* (2019) C1 CAGE detects transcription start sites and enhancer activity at  
646 single-cell resolution. *Nat Commun* 10.
- 647 18. Goetz JJ & Trimarchi JM (2012) Transcriptome sequencing of single cells with Smart-Seq. *Nat*  
648 *Biotechnol* 30(8):763-765.
- 649 19. Picelli S, *et al.* (2014) Full-length RNA-seq from single cells using Smart-seq2. *Nat Protoc*  
650 9(1):171-181.
- 651 20. Byrne A, *et al.* (2017) Nanopore long-read RNAseq reveals widespread transcriptional  
652 variation among the surface receptors of individual B cells. *Nat Commun* 8.
- 653 21. Ng P, *et al.* (2005) Gene identification signature (GIS) analysis for transcriptome  
654 characterization and genome annotation. *Nat Methods* 2(2):105-111.
- 655 22. Haberle V, Forrest ARR, Hayashizaki Y, Carninci P, & Lenhard B (2015) CAGEr: precise TSS data  
656 retrieval and high-resolution promoterome mining for integrative analyses. *Nucleic Acids Res*  
657 43(8).
- 658 23. Islam S, *et al.* (2014) Quantitative single-cell RNA-seq with unique molecular identifiers. *Nat*  
659 *Methods* 11(2):163-+.
- 660 24. Arguel MJ, *et al.* (2017) A cost effective 5' selective single cell transcriptome profiling  
661 approach with improved UMI design. *Nucleic Acids Res* 45(7).
- 662 25. Consortium F, *et al.* (2014) A promoter-level mammalian expression atlas. *Nature*  
663 507(7493):462-470.
- 664 26. Wang R, Nambiar R, Zheng D, & Tian B (2018) PolyA\_DB 3 catalogs cleavage and  
665 polyadenylation sites identified by deep sequencing in multiple genomes. *Nucleic Acids Res*  
666 46(D1):D315-D319.
- 667 27. Zeisel A, *et al.* (2015) Cell types in the mouse cortex and hippocampus revealed by single-cell  
668 RNA-seq. *Science* 347(6226):1138-1142.
- 669 28. Hashimshony T, *et al.* (2016) CEL-Seq2: sensitive highly-multiplexed single-cell RNA-Seq.  
670 *Genome Biol* 17:77.
- 671 29. Velten L, *et al.* (2015) Single-cell polyadenylation site mapping reveals 3' isoform choice  
672 variability. *Mol Syst Biol* 11(6).
- 673 30. Leung MK, Xiong HY, Lee LJ, & Frey BJ (2014) Deep learning of the tissue-regulated splicing  
674 code. *Bioinformatics* 30(12):i121-129.

- 675 31. Qin Z, Stoilov P, Zhang X, & Xing Y (2018) SEASTAR: systematic evaluation of alternative  
676 transcription start sites in RNA. *Nucleic Acids Res* 46(8):e45.
- 677 32. Hu YJ, *et al.* (2016) Simultaneous profiling of transcriptome and DNA methylome from a  
678 single cell. *Genome Biol* 17.
- 679 33. Liao Y, Smyth GK, & Shi W (2014) featureCounts: an efficient general purpose program for  
680 assigning sequence reads to genomic features. *Bioinformatics* 30(7):923-930.
- 681 34. Kharchenko PV, Silberstein L, & Scadden DT (2014) Bayesian approach to single-cell  
682 differential expression analysis. *Nat Methods* 11(7):740-U184.
- 683 35. Li H (2018) Minimap2: pairwise alignment for nucleotide sequences. *Bioinformatics*  
684 34(18):3094-3100.
- 685 36. L. B (2001) Random forests. *Machine learning* 45(1):5-32.
- 686 37. Breiman L, Friedman, J.H., Olshen, R.A., and Stone, C.I. (1984) Classification and regression  
687 trees. (Belmont, Calif.: Wadsworth).
- 688 38. Boser BE, Isabelle M. Guyon, and Vladimir N. Vapnik. (1992) A training algorithm for optimal  
689 margin classifiers. *Proceedings of the fifth annual workshop on Computational learning*  
690 *theory. ACM*, pp 144-152.
- 691 39. Dietterich TG (2000) Ensemble methods in machine learning. in *International workshop on*  
692 *multiple classifier systems* (Springer, Berlin, Heidelberg).
- 693 40. Quinlan AR & Hall IM (2010) BEDTools: a flexible suite of utilities for comparing genomic  
694 features. *Bioinformatics* 26(6):841-842.
- 695 41. Stuart T, *et al.* (2019) Comprehensive Integration of Single-Cell Data. *Cell* 177(7):1888-1902  
696 e1821.
- 697 42. Trapnell C, *et al.* (2014) The dynamics and regulators of cell fate decisions are revealed by  
698 pseudotemporal ordering of single cells. *Nat Biotechnol* 32(4):381-386.

699

700

701

702



703 **Figure**

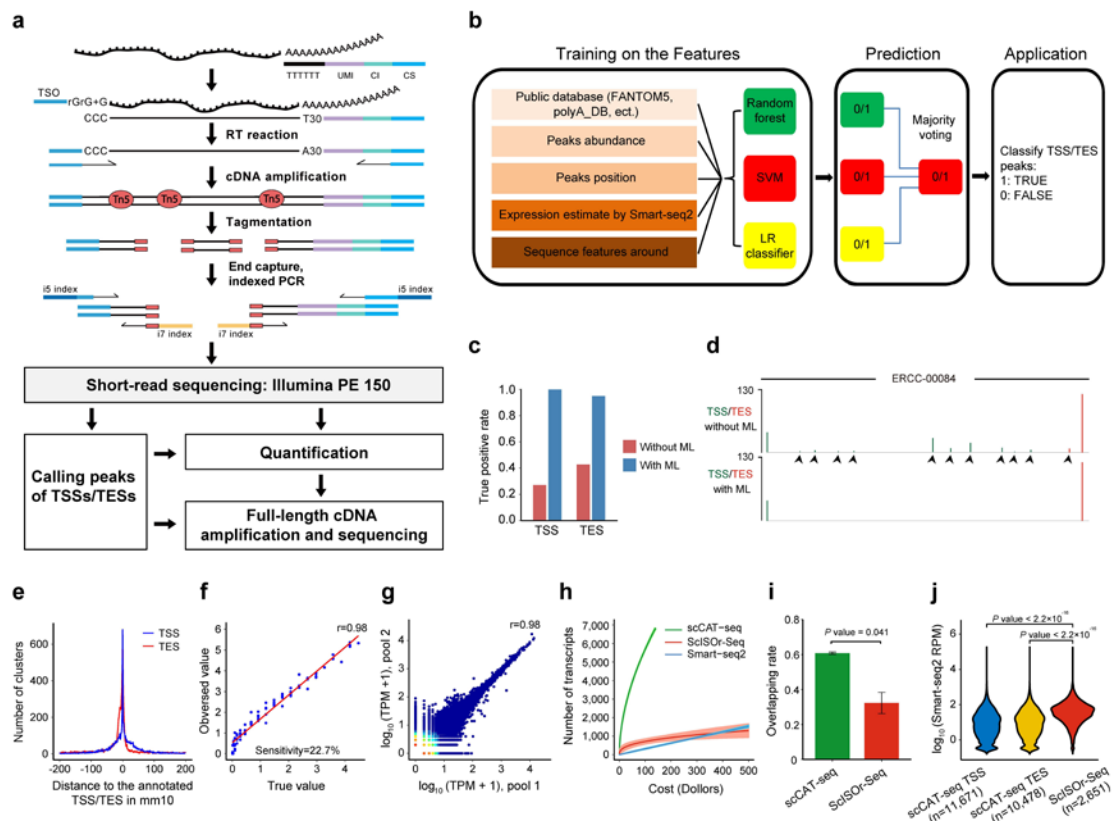

704

705 Figure 1. The scCAT-seq method and performance. **a**, Schematic of the scCAT-seq  
 706 method. Template switching reverse transcription of full-length cDNA was performed  
 707 with oligo-dT primer containing a unique molecular identifier (UMI), a cell identifier  
 708 (CI), and a common sequence (CS). After PCR amplification, cDNA was tagged  
 709 with Tn5 transposases. Both 5' and 3' ends of the cDNA were captured and amplified  
 710 by PCR using primers binding to CS and TSO sequences, during which Illumina  
 711 sequencing indexes were tagged. In addition, Smart-seq2 libraries are generated from  
 712 cDNA of the same cell. Sequencing data was processed and transcription start sites  
 713 (TSSs) and transcription end sites (TESs) were identified by machine learning models,  
 714 following by quantification of transcript isoforms. **b**, Schematic of the machine  
 715 learning model. Features were collected and three machine learning models were  
 716 implemented. Predictions from all models were integrated by majority voting. **c**, True  
 717 positive for identification of TSSs and TESs with and without optimization by the  
 718 majority voting strategy based on machine learning models. **d**, Genome browser  
 719 shows the example of TSS/ TES identification with or without machine learning (ML).

720 The false positive peaks filtered out by ML were indicated by arrows. **e**, Distance of  
721 TSSs/TESSs identified by scCAT-seq in the genome to those annotated in mm10. **f**,  
722 Scatter plot of observed transcript expression levels (y axis) and true abundance (x  
723 axis) of ERCC spike-ins through 5'-end quantification (n = 92). Each point represents  
724 a transcript. The Pearson's correlation coefficient is shown in the upper right corner.  
725 The capture efficiency is estimated by the probability of an individual transcript could  
726 be detected at sequencing depth of one million. **g**, Scatter plots shows the Pearson's  
727 correlation of transcriptional level of isoforms between replicated pools of 3 single  
728 cells. **h**, The number of transcripts with both ends captured using scCAT-seq,  
729 Smart-seq2, or ScISOr-Seq, versus cost. The shaded regions represent 95%  
730 confidence interval. **i**, Barplot shows the overlapping rate of genes detected among  
731 single cells, by scCAT-seq versus ScISOr-Seq (n = 3 single cells). Significance was  
732 computed using two sided t-test. Error bars represent standard error of the mean. **j**,  
733 Violin plot for expression level comparison between genes detected by scCAT-seq and  
734 ScISOr-Seq. Gene expression levels were quantified by Smart-seq RPM value.  
735 Significance was computed using two-sided Wilcoxon test.

736

737

738

739

740

741

742

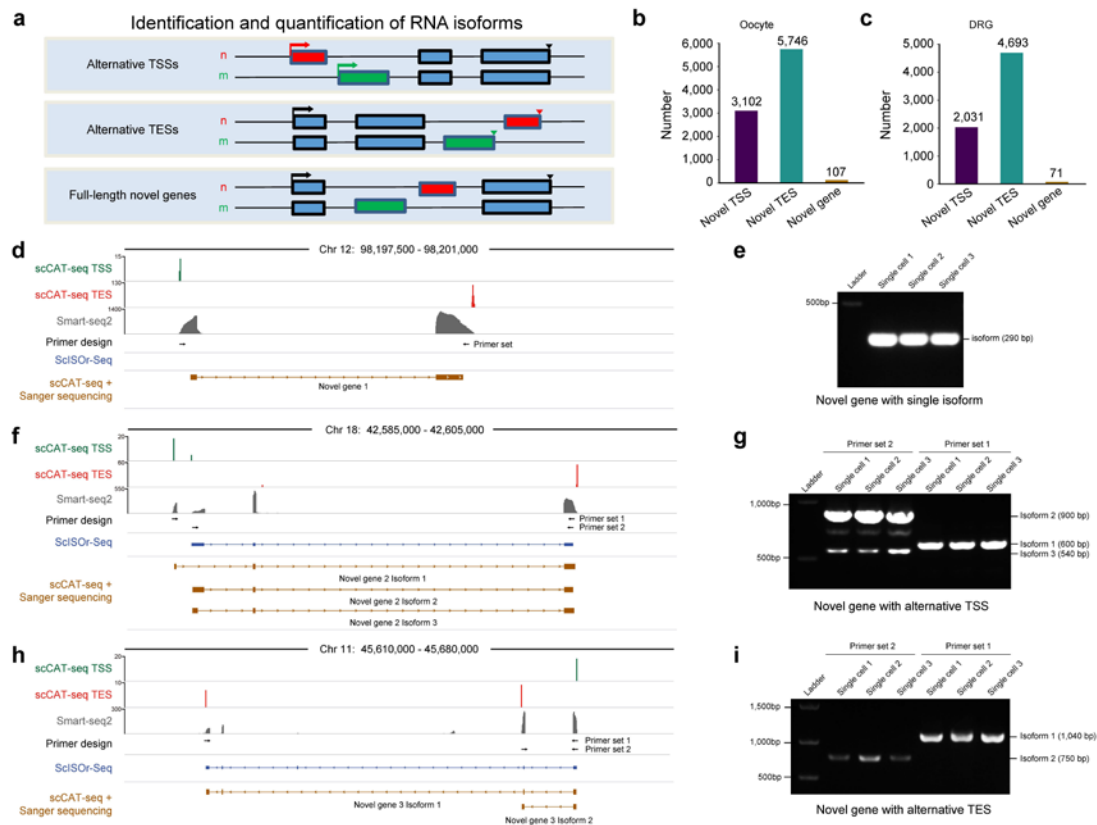

743

744 Figure 2. Characterization of novel transcripts and isoforms of single cells with  
 745 scCAT-seq. **a**, Schematic of the functions of scCAT-seq. **b**, Barplot showing the  
 746 number of novel isoforms of annotated genes and novel, unannotated transcripts in  
 747 DRG neurons. The number of transcripts for each category is indicated above the box.  
 748 **c**, Barplot showing the number of novel isoforms of annotated genes and novel,  
 749 unannotated transcripts in oocytes. **d**, Genome browser track for an example of novel  
 750 genes with single isoform. **e**, Gel image showing validation result of novel gene in **d**. **f**,  
 751 Genome browser track for an example of novel genes with alternative TSSs on a  
 752 different exon. **g**, Gel image showing validation result of novel gene in **f**. **h**, Genome  
 753 browser track for an example of novel genes with alternative polyadenylation sites on  
 754 a different exon. **i**, Gel image showing validation result of novel gene in **h**.

755

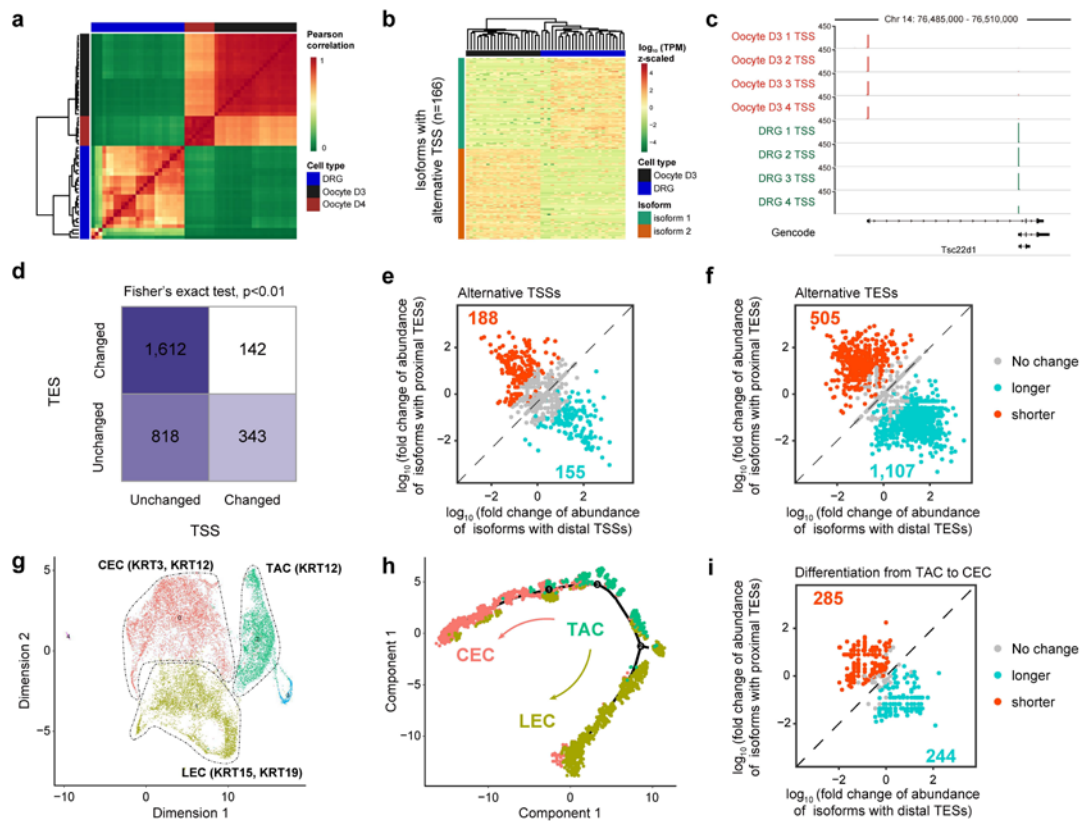

756

757 Figure 3. Quantification of cell specific isoforms discriminate cell types and illustrates  
 758 the dynamics of isoform choices during oocyte ageing and corneal epithelial  
 759 regeneration. **a**, Heatmap for Pearson's correlation coefficient of transcriptomes of  
 760 DRG neuron and oocytes, based on 5'-end quantification of RNA isoforms. **b**,  
 761 Heatmap showing RNA isoforms of alternative TSS choices with cell type specificity.  
 762 The major isoforms either in oocytes or in DRG neurons are shown ( $n = 166$   
 763 isoforms). **c**, Genome browser tracks showing the alternative choices of TSS of  
 764 *Tse22d1* between oocytes and DRG neurons. **d**, Heatmap showing the number of  
 765 transcripts with or without TSSs/TESS changes during oocyte post-ovulatory ageing. **e**,  
 766 Expression data with isoform specificity reveals isoform expression dynamics during  
 767 oocyte post-ovulatory ageing ( $n = 1,161$  genes). **f**, Expression data with isoform  
 768 specificity reveals TES changes and isoform expression dynamics during oocyte  
 769 post-ovulatory ageing ( $n = 1,754$  genes). **g**, UMAP plot depicting cell clusters  
 770 identified with scCAT-seq, including corneal epithelial cell (CEC), limbal corneal  
 771 epithelial cell (LEC), and transient amplifying cell (TAC), and their specific marker  
 772 genes ( $n = 7,848$  cells). **h**, A pseudotime trajectory of single cells constructed using

773 Monocle. Indicated in color are the three presumptive states corresponding to CEC,  
774 TAC, and LEC. **i**, Expression data with isoform specificity reveals TES changes and  
775 isoform expression dynamics during differentiation of CEC from TAC (n = 584  
776 genes).  
777

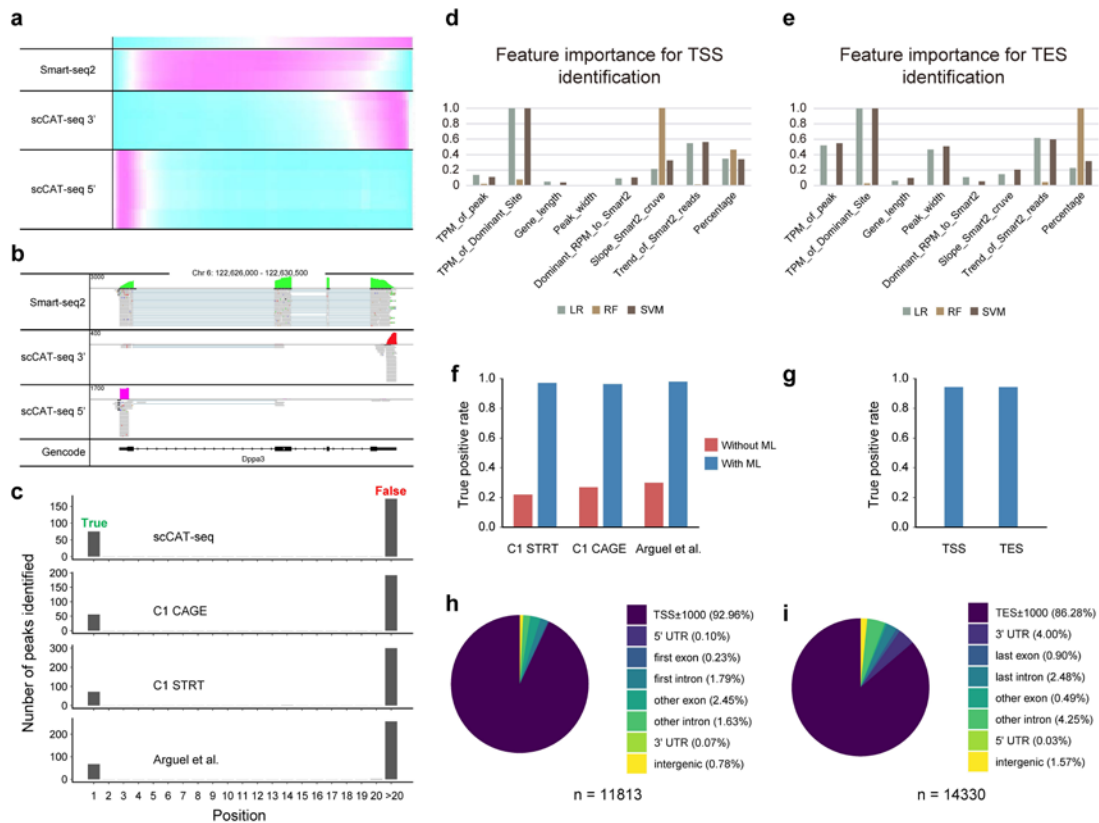

778

779 Supplementary figure 1. Machine learning improves accuracy of scCAT-seq  
 780 demarcated isoform boundaries in single cells. **a**, Distribution of sequencing reads  
 781 along the genes from head to tail from Smart-seq2 and scCAT-seq. **b**, *Dppa3* as an  
 782 example gene, showing the distribution of sequencing reads of Smart-seq2 and  
 783 scCAT-seq. **c**, TSS peaks identified in the data of scCAT-seq, as well as public data  
 784 sets of ERCC for C1 CAGE, C1 STRT and Arguel et al. True positive peaks located  
 785 around the annotated TSSs and false positive TSS peaks located elsewhere are  
 786 indicated respectively. **d**, Relative feature importance of the eight features for TSS  
 787 identification in random forest model (RF), support vector machine (SVM), and  
 788 logistic regression classifier (LR). **e**, Relative feature importance of the eight features  
 789 for TES identification in the three machine learning models. The value of importance  
 790 for SVM and LR are first transformed to absolute value and normalized to the highest  
 791 value of the eight features. **f**, True positive for identification of TSSs for the public  
 792 data sets with and without optimization by the majority voting strategy based on  
 793 machine learning models. **g**, True positive for identification of TSSs and TESs for the  
 794 pooled single DRG neurons data sets with optimization by the majority voting

795 strategy based on machine learning models. **h**, Pie chart with the genomic distribution  
796 of the identified TSSs. The total number of TSS peaks identified after optimization by  
797 the machine learning models is indicated under the pie chart. **i**, Pie chart with the  
798 genomic distribution of the identified TESs.

799

800

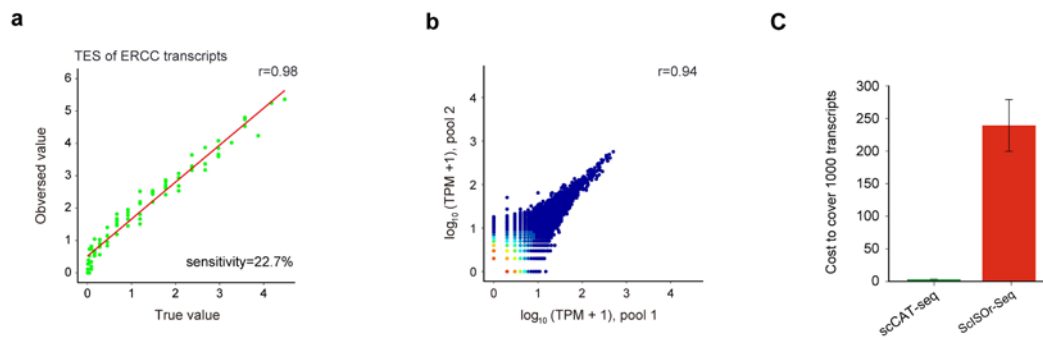

801

802 Supplementary figure 2. Accuracy and consistency of scCAT-seq performance for  
803 isoform quantification. **a**, Scatter plot of observed transcript expression levels (y axis)  
804 and true abundance (x axis) of ERCC spike-ins through 3'-end quantification. **b**,  
805 Scatter plots showing the correlation of transcriptional level of isoforms between  
806 replicated samples (3 cells pooled) based on 3'-end quantification. **c**, Comparison of  
807 the cost for the same number of transcripts (1,000) between PacBio ScISO-seq,  
808 scCAT-seq. The price is estimated based on the market price in China. Error bars  
809 represent 95% confidence interval.

810



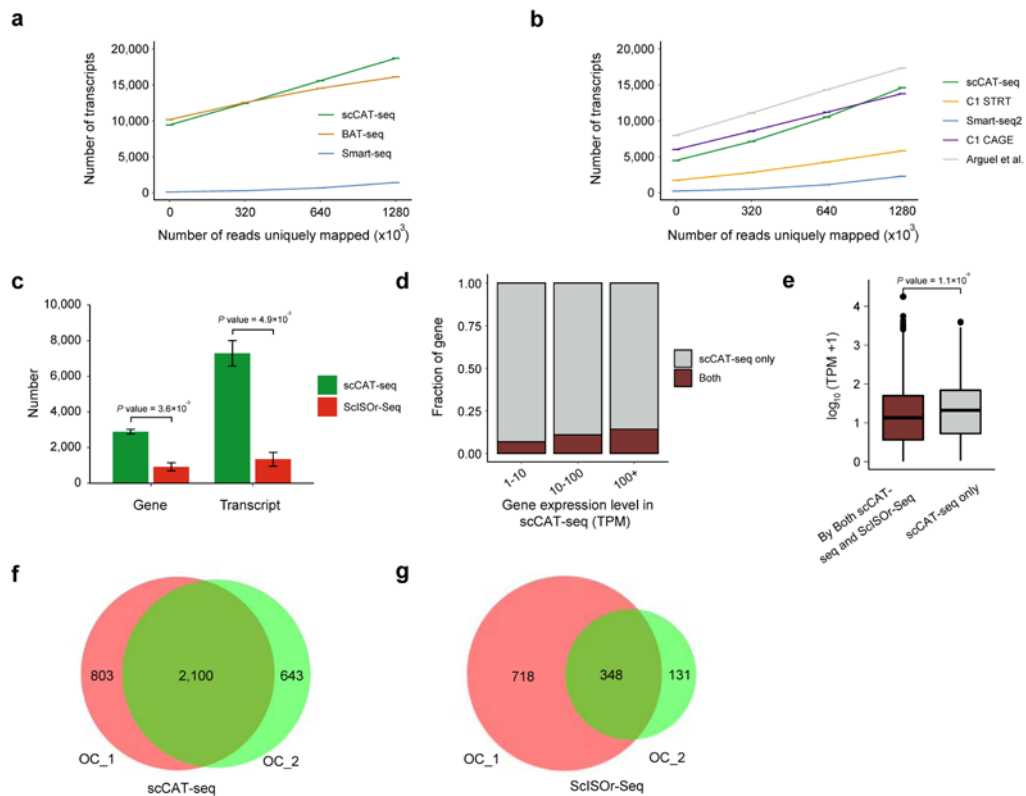

811

812 Supplementary figure 3. The number of genes covered by scCAT-seq. **a**, The number  
 813 of transcripts with 3' tail detected by scCAT-seq, BAT-seq, and Smart-seq2 at variable  
 814 sequencing depth. Error bars represents standard error of the mean. **b**, The number of  
 815 transcripts with 5' head detected by scCAT-seq, C1 STRT, Smart-seq2, Arguel et al.,  
 816 and C1 CAGE at variable sequencing depth. Error bars represents standard error of  
 817 the mean. **c**, Number of genes and transcripts covered by scCAT-seq and ScISOr-Seq  
 818 respectively (n = 3). The number of reads for scCAT-seq was 4 million per single cell  
 819 and the CCS number for ScISOr-Seq is 50,000 per cell. Significance was computed  
 820 using two sided t-test. Error bars represents standard error of the mean. **d**, Stacked  
 821 barplots showing the number of genes with different expression levels detected in  
 822 oocytes by scCAT-seq and ScISOr-Seq. **e**, Boxplot for expression level comparison  
 823 between genes detected by scCAT-seq only and by both scCAT-seq and ScISOr-Seq (n  
 824 = 9,626). Significance was computed using two-sided Wilcoxon test. **f**, Venn diagram  
 825 for genes detected concordantly among single cells by scCAT-seq. **g**, Venn diagram  
 826 for genes detected concordantly among single cells by ScISOr-Seq.

827

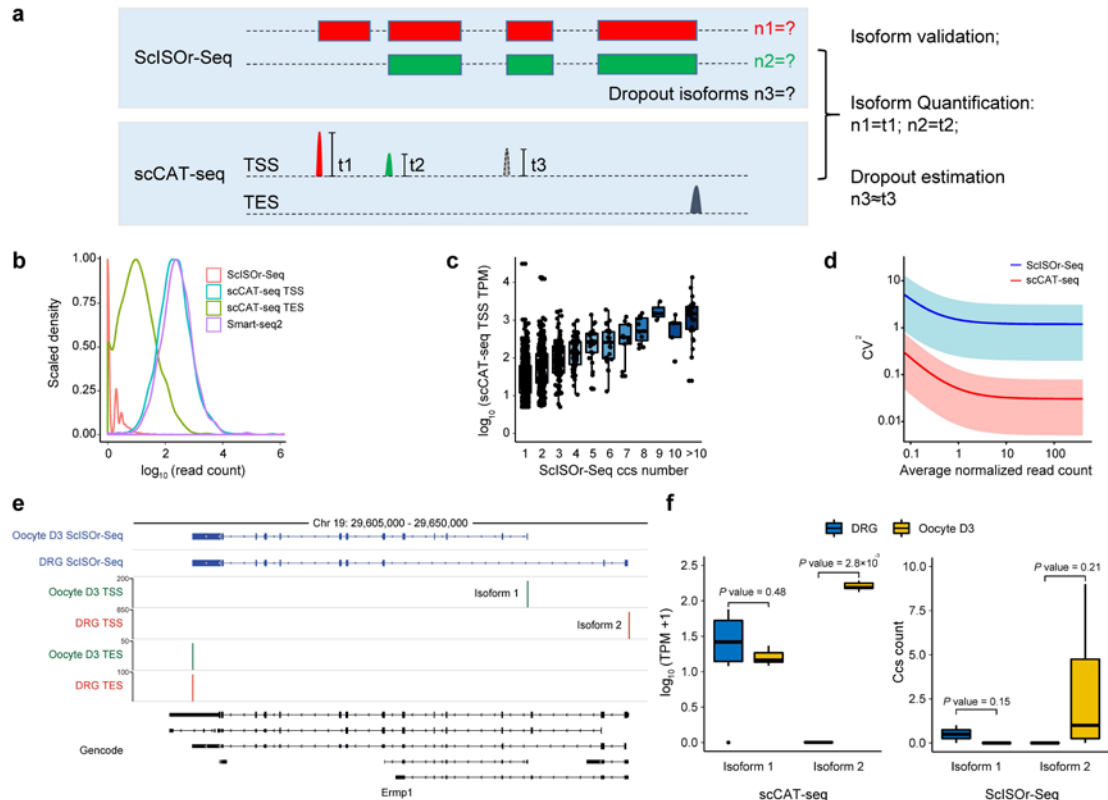

828

829 Supplementary figure 4. scCAT-seq improves upon the performance of scISOr-seq for  
 830 single cell RNA isoform quantification. **a**, Schematic showing performance  
 831 improvement of ScISOr-Seq via scCAT-seq quantification. **b**, Density plot showing  
 832 the comparison of genes read count values among ScISOr-Seq, scCAT-seq and  
 833 Smart-seq2. **c**, Boxplot for the expression level comparison among genes with  
 834 different CCS numbers detected by ScISOr-Seq. **d**, Squared coefficients of variation  
 835 of scCAT-seq and ScISOr-Seq, versus the means of normalized read counts. The  
 836 shaded regions represent 95% confidence interval. **e**, Genome browser track showing  
 837 an example of *Ermp1*, which has two isoforms detected by both scCAT-seq and  
 838 ScISOr-Seq. **f**, Boxplot for the example gene *Ermp1*, which has two isoforms  
 839 differentially expressed in oocytes or in DRG neurons, while the expression value  
 840 assessed by ScISOr-Seq is not differential between the two cell types. Significance  
 841 was computed using two-sided Wilcoxon test.

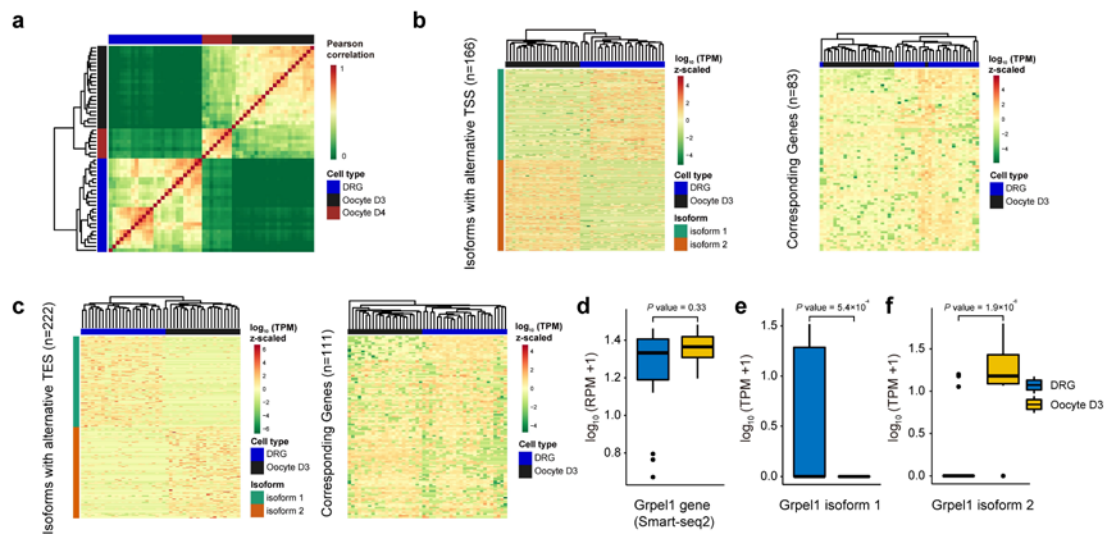

842

843 Supplementary figure 5. Identification and quantification of cell-type specific  
844 transcript isoforms. **a**, Heatmap for Pearson's correlation coefficient of transcriptomes  
845 of DRG neuron and oocytes, based on 3'-end quantification of RNA isoforms. **b**,  
846 Heatmap showing RNA isoforms of alternative TSS choices with cell type specificity  
847 (left panel), and the expression of corresponding genes assessed by Smart-seq2 (right  
848 panel). **c**, Heatmap showing RNA isoforms of alternative TES choices with cell type  
849 specificity (left panel), and the expression of corresponding genes assessed by  
850 Smart-seq2 (right panel). **d-f**, Boxplot for the example gene *Grpel1*, which has two  
851 isoforms differentially expressed in oocytes or in DRG neurons (e, f), while the  
852 overall gene expression assessed by Smart-seq2 is not differential between the two  
853 cell types (d). For **d-f**, significance was computed using two-sided Wilcoxon test (n =  
854 35).

855

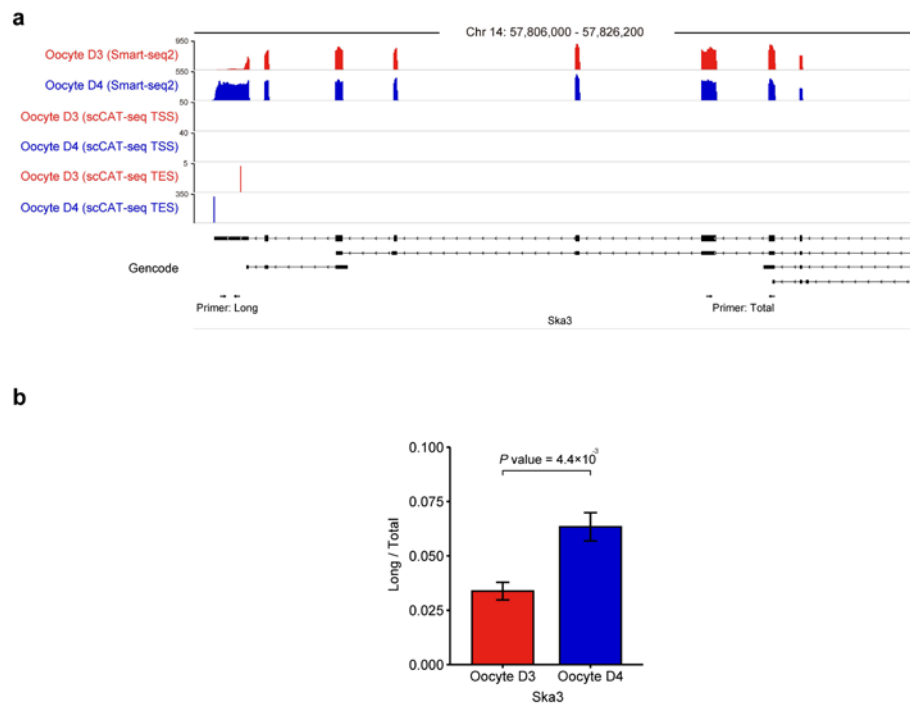

856

857 Supplementary figure 6. Examples of full-length isoforms with alternative TES during  
858 oocyte post-ovulatory ageing. **a**, Genome browser track showing the TSS dynamic  
859 choices during oocytes post-ovulatory ageing. **b**, Fold change in expression of the  
860 *Ska3* long 3' UTR isoform (long) relative to total *Ska3* expression (total) between  
861 oocyte D3 and oocyte D4 single cells, measured by RT-qPCR. Error bars represent  
862 standard error of the mean (n = 6 biological replicates). Significance was computed  
863 using two-sided t-test.

864

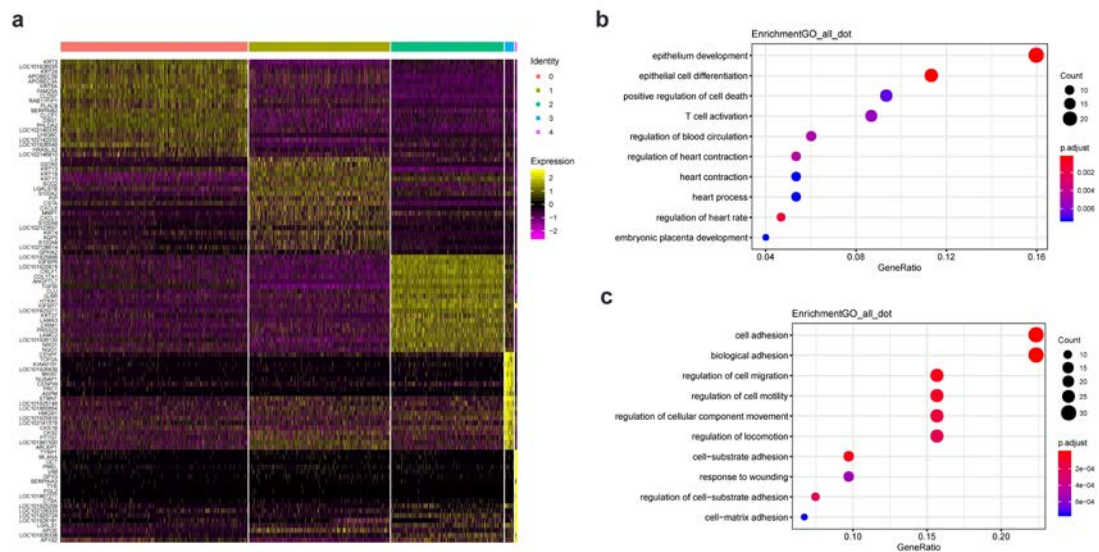

865

866 Supplementary figure 7. Cell-type and marker-gene identification in the crab-eating  
867 monkey cornea. **a**, Heatmap shows the top 20 marker genes expressed in LEC, CEC  
868 and TAC respectively. Color bars on the top are used to discriminate different cell  
869 types. **b**, GO items enriched in the genes up-regulated in CEC compared to TAC. **c**,  
870 GO items enriched in the genes down-regulated in CEC compared to TAC.

871

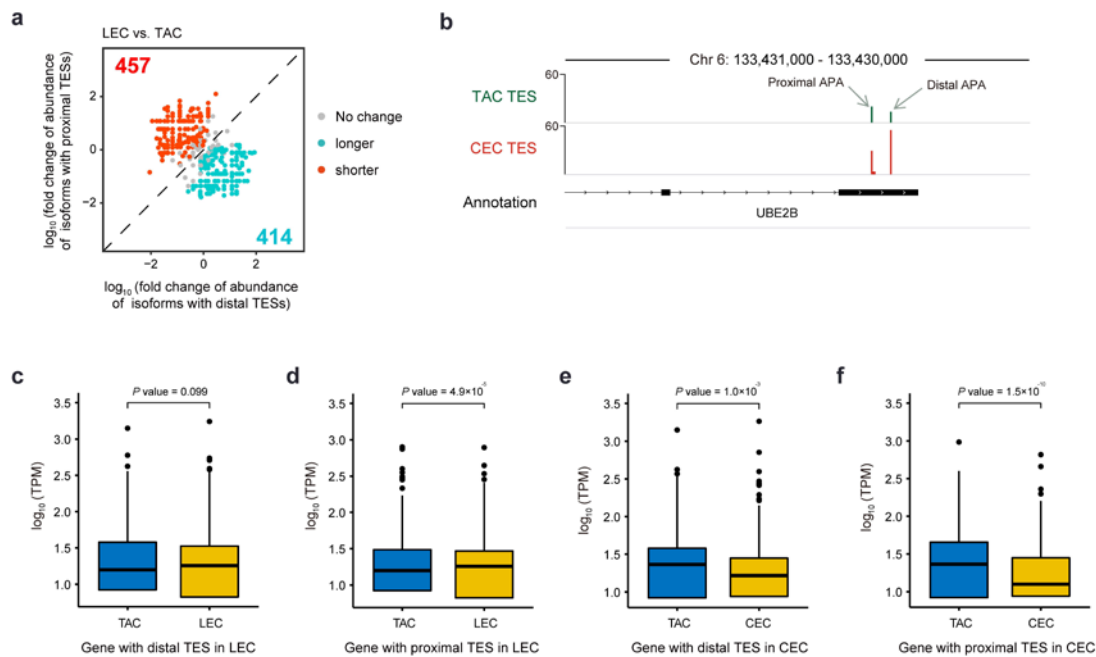

872

873 Supplementary figure 8. Differences between LEC and TAC in terms of RNA  
874 expression and APA choices. **a**, Expression data with isoform specificity reveals  
875 isoform expression differences between LEC and TAC (n = 956 genes). **b**, Genome  
876 browser track shows an example of APA choices for the gene *UBE2B* during  
877 differentiation of CEC from TAC (n = 414 genes). **c**, Boxplot comparing expression  
878 of genes in LEC and TAC, which have distal TESs in LEC (n = 414 genes). **d**,  
879 Boxplot comparing expression of genes in LEC and TAC, which have proximal TESs  
880 in LEC (n = 457 genes). **e**, Boxplot comparing expression of genes in CEC and TAC,  
881 which have distal TESs in CEC (n = 244 genes). **f**, Boxplot comparing expression of  
882 genes in CEC and TAC, which have proximal TESs in CEC (n = 285 genes). For **c-f**,  
883 significance was computed using two-sided Wilcoxon test.

884

885

886 Supplementary table 1.

| Sample  | Sequencing depth |
|---------|------------------|
| ERCC_01 | 1,052,270        |
| ERCC_02 | 1,571,949        |
| ERCC_03 | 3,799,426        |
| ERCC_04 | 3,989,246        |
| ERCC_05 | 2,291,544        |
| ERCC_06 | 3,835,792        |
| ERCC_07 | 3,986,186        |
| ERCC_08 | 7,964,775        |
| ERCC_09 | 7,645,733        |
| ERCC_10 | 5,223,629        |
| Average | 4,136,055        |

887

888 Sequencing depth for each ERCC spike-in libraries generated by scCAT-seq methods

889 are listed.

890

891 Supplementary table 2.

| Library name | Sequencing Depth | TSS number | TES number | Gene number |
|--------------|------------------|------------|------------|-------------|
| D41_71       | 2,493,578        | 11,155     | 4,867      | 3,917       |
| D44_52       | 3,100,138        | 12,906     | 5,667      | 4,594       |
| D44_72       | 1,612,099        | 10,693     | 4,601      | 3,558       |
| D45_52       | 2,723,321        | 12,858     | 4,866      | 4,066       |
| D45_72       | 2,080,059        | 11,355     | 4,352      | 3,570       |
| D46_71       | 3,955,396        | 13,570     | 5,547      | 4,674       |
| D47_52       | 1,628,466        | 10,786     | 5,433      | 4,295       |
| D47_72       | 1,056,585        | 9,567      | 4,276      | 3,232       |
| D48_52       | 1,484,463        | 10,165     | 4,180      | 3,346       |
| D48_72       | 1,869,191        | 10,710     | 4,407      | 3,501       |
| D49_72       | 1,330,893        | 9,587      | 3,671      | 2,902       |
| D50_52       | 1,518,348        | 10,201     | 4,288      | 3,474       |
| D50_71       | 2,249,770        | 10,802     | 4,104      | 3,343       |
| D50_72       | 2,717,055        | 11,725     | 5,136      | 4,262       |
| D51_52       | 3,733,854        | 12,258     | 5,437      | 4,600       |
| D51_72       | 2,474,653        | 11,314     | 3,860      | 3,253       |
| D52_52       | 2,624,766        | 12,142     | 5,692      | 4,689       |
| D52_72       | 4,015,130        | 13,347     | 5,869      | 4,998       |
| Average      | 2,370,431        | 11,397     | 4,792      | 3,904       |

892

893 Information about 18 single DRG neurons generated by scCAT-seq method for further  
894 benchmarking in this study are listed in this table. A gene is detected only if there are  
895 TSS peaks and TES peaks mapped to the said gene.

896



897 Supplementary table 3. ScISOr-Seq information in this study

| Sample | Subreads base (G) | Number of Subreads | Average subreads length | Number of CCS | Number of FLNC |
|--------|-------------------|--------------------|-------------------------|---------------|----------------|
| DRG_1  | 0.32              | 214,295            | 1,487                   | 19,947        | 4,289          |
| DRG_2  | 0.35              | 237,777            | 1,481                   | 23,070        | 3,835          |
| OC_1   | 0.89              | 612,741            | 1,446                   | 47,152        | 8,171          |
| OC_2   | 0.24              | 165,171            | 1,436                   | 13,305        | 780            |
| OC_3   | 1.03              | 703,398            | 1,462                   | 54,258        | 22,549         |
| OC_4   | 3.52              | 2492,563           | 1,414                   | 193,637       | 13,932         |
| OC_5   | 0.22              | 145,585            | 1,483                   | 14,857        | 1,009          |
| OC_6   | 1.31              | 912,567            | 1,441                   | 68,471        | 27,559         |

898

899 Information about 6 single oocytes and 2 single DRG neurons generated by scISO-seq  
900 are listed.

901

902

903 Supplementary table 4. Cloning primers used in this study

| Target gene      | Sequences (5' → 3')       |
|------------------|---------------------------|
| Novel gene 1 F   | CTGCATCAGCTTCTGTTTCCT     |
| Novel gene 1 R   | GCTTAACAGTTTCGGAGGGT      |
| Novel gene 2-1 F | CACTCCTCCACGGCCTC         |
| Novel gene 2-1 R | TTCTTTACAGATATTTAAGGCACCC |
| Novel gene 2-2 F | GCTGGTCACGGTTGTACCTT      |
| Novel gene 2-2 R | ATCATGGGAAGGGCATGAGC      |
| Novel gene 3-1 F | TTACATGCTCTGACTTGGGCT     |
| Novel gene 3-1 R | GTGTGCTCTGGCTTGCCATT      |
| Novel gene 3-2 F | AGCCA ACTCTAAGATGGCACC    |
| Novel gene 3-2 R | CTGAGCTTCGGTTTGGTGTG      |

904

905 Primer sequences used to clone full-length novel genes are listed.

906

907
